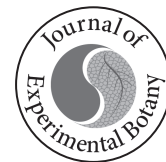

REVIEW PAPER

# Chloroplasts at work during plant innate immunity

Irene Serrano<sup>1</sup>, Corinne Audran<sup>1</sup> and Susana Rivas<sup>1,\*</sup>

<sup>1</sup>LIPM, Université de Toulouse, INRA, CNRS, Castanet-Tolosan, France

\*Correspondence: [Susana.Rivas@toulouse.inra.fr](mailto:Susana.Rivas@toulouse.inra.fr)

Received 21 December 2015; Accepted 10 February 2016

Editor: Markus Teige, University of Vienna

## Abstract

**The major role played by chloroplasts during light harvesting, energy production, redox homeostasis, and retrograde signalling processes has been extensively characterized. Beyond the obvious link between chloroplast functions in primary metabolism and as providers of photosynthesis-derived carbon sources and energy, a growing body of evidence supports a central role for chloroplasts as integrators of environmental signals and, more particularly, as key defence organelles. Here, we review the importance of these organelles as primary sites for the biosynthesis and transmission of pro-defence signals during plant immune responses. In addition, we highlight interorganellar communication as a crucial process for amplification of the immune response. Finally, molecular strategies used by microbes to manipulate, directly or indirectly, the production/function of defence-related signalling molecules and subvert chloroplast-based defences are also discussed.**

**Key words:** Chloroplast, interorganellar signalling, microbial effector, plant immunity, pro-defence molecule, retrograde signalling, stromule.

## Introduction

The chloroplast is a vital component of photosynthetic cells in cyanobacteria, algae, and higher plants, since it is the organelle in which photosynthesis takes place. Chloroplasts are large plant cell organelles bounded by a double-celled composite membrane with an intermembrane space, called the chloroplast envelope. In addition to the inner and outer membranes, chloroplasts have a third internal membrane system, known as the thylakoid membrane, which is extensively folded. This thylakoid membrane divides the stroma, which lies inside the envelope but outside the thylakoid membrane, and the thylakoid lumen (Cooper, 2000). The thylakoid membrane contains chlorophyll and other pigments responsible for capturing light energy. Although photosynthesis is the major function of the chloroplast, its roles clearly extend further than converting light energy into chemical energy.

It seems obvious that plants undergo an increased demand for photosynthesis during the interaction with pathogens, as

the biosynthesis of pro-defence molecules and, more generally, the induction of defence responses requires energy that is provided through photosynthesis (Hammerschmidt, 1999; Swarbrick and Lefert, 2006). Moreover, virulent pathogens feed on plant carbon compounds, and some of them are able to use plant transporters of the SWEET family to promote sugar efflux, further increasing photosynthesis demand in host cells (Chen *et al.*, 2010). However, instead of increased photosynthesis, several reports have revealed suppression of photosynthesis, during pathogen attack. Along these lines, the chloroplast is emerging as a very dynamic signalling compartment that is able to sense perturbations (biotic and abiotic stresses) at the subcellular level and to integrate a

multitude of intracellular signals in order to communicate those perturbations to other organelles (Padmanabhan and Dinesh-Kumar, 2010; Bobik and Burch-Smith, 2015). The chloroplast, together with the nucleus, cell membrane, and endoplasmic reticulum (ER), plays a critical role during the establishment of plant immunity against microbial attack and, in this context, the importance of efficient interorganelar signalling to achieve a synchronized whole-cell response during plant defence responses is becoming increasingly evident (Padmanabhan and Dinesh-Kumar, 2010; Nomura *et al.*, 2012; Bobik and Burch-Smith, 2015; Caplan *et al.*, 2015). The orchestration of this intracellular signalling is achieved by the action of the chloroplast as a receiver, an integrator, and a transmitter of specific signals that co-ordinate expression of nuclear and plastid genomes in order to sustain homeostasis.

Plants are sessile organisms lacking an adaptive immune system. Nonetheless, they have developed a multilayered defence system that effectively protects them from a wide range of pathogens, including bacteria, viruses, and fungi. The immune system of plants can be divided into two layers of defence responses. The first line of defence is activated by the detection of conserved pattern-associated molecular patterns (PAMPs), by pattern-recognition receptors (PRRs), leading to PAMP-triggered immunity (PTI), a basal immune status effective against a broad spectrum of pathogens (Nicaise *et al.*, 2009; Macho and Zipfel, 2014). To combat the defence strategies of the plant, host-adapted pathogens secrete various effector molecules that manipulate host defence responses and facilitate colonization (Dangl and Jones, 2006; Göhre and Robatzek, 2008; Dodds and Rathjen, 2010; Trotta *et al.*, 2014). In the course of plant–pathogen co-evolution, plants have evolved resistance (R) proteins that detect pathogen effectors, either directly or via the effect that they produce on a plant target, then activating effector-triggered immunity (ETI) (Dodds and Rathjen, 2010; Dangl *et al.*, 2013; Stuart *et al.*, 2013).

A hallmark of ETI is the hypersensitive response (HR), a localized form of programmed cell death (PCD) in the vicinity of the infection site that relies on a burst of reactive oxygen species (ROS) in chloroplasts (Zurbriggen *et al.*, 2010). Moreover, the chloroplast is involved in the synthesis of important mediators of plant immune responses, such as the hormones salicylic acid (SA), jasmonic acid (JA), and abscisic acid (ABA), and secondary messengers including calcium and ROS (León and Sánchez-Serrano, 1999; Wildermuth *et al.*, 2001; Nambara and Marion-Poll, 2005; Torres *et al.*, 2006; Kozuleva *et al.*, 2011; Wasternack and Hause, 2013; Bobik and Burch-Smith, 2015; Stael *et al.*, 2015). In addition to hosting biosynthesis of defence-related molecules, recent reports highlight the importance of the chloroplast in the sensing of signals and in the amplification of downstream signalling during PTI and ETI (Nomura *et al.*, 2012; Caplan *et al.*, 2015). Given the crucial role played by chloroplasts in the orchestration of defence signalling, it is thus not surprising that microbes target chloroplast-related functions, and in some cases chloroplasts themselves, in their attempt to subvert host defences and promote virulence.

Here we review the central role of chloroplasts in the production and delivery of pro-defence molecules, as well as in the integration of biotic stress signals and in the amplification of downstream signalling. Molecular strategies used by pathogens to hijack chloroplast functionality, directly or indirectly, are also discussed.

## The chloroplast: a major production site of pro-defence molecules

Chloroplasts play a central role in plant immunity by hosting biosynthesis of several key defence-related molecules, including hormones and secondary messengers such as calcium and ROS (Fig. 1).

SA biosynthesis and accumulation are tightly regulated since constitutive SA accumulation has negative impacts on plant fitness (Ishihara *et al.*, 2008; Pajerowska-Mukhtar *et al.*, 2012; Chandran *et al.*, 2014). SA biosynthesis is triggered during PTI and ETI, upon recognition of PAMPs and effectors, respectively (Mishina and Zeier, 2007). Plants synthesize SA through two distinct enzymatic pathways: the isochorismate (IC) and the phenylalanine ammonia-lyase (PAL) pathways. Both pathways commonly utilize chorismate, the end-product of the shikimate pathway, to produce SA, but the IC pathway, which is operative in plastids, is the predominant source of both basal and pathogen-induced SA production in Arabidopsis (Dempsey *et al.*, 2011). In chloroplasts, IC synthases catalyse the conversion of chorismate into IC (Wildermuth *et al.*, 2001; Strawn *et al.*, 2007; Garcion *et al.*, 2008) that is further converted to SA (Dempsey *et al.*, 2011). SA is a key signalling molecule in resistance against biotrophic and hemibiotrophic pathogens (Pieterse *et al.*, 2012), although it has also been shown to be involved in the response to necrotrophic pathogens (Glazebrook, 2005). SA plays a primary role not only in local PTI and ETI responses (Pieterse *et al.*, 2012; Seyfferth and Tsuda, 2014; Tanaka *et al.*, 2015), but also in systemic defence signalling during systemic acquired resistance (SAR), a long-lasting and broad-spectrum induced resistance to secondary infection that follows the onset of local defences (Vlot *et al.*, 2009; Spoel and Dong, 2012). In addition, SA is a central regulator of defence responses by crosstalk with other hormone signalling pathways in order to fine-tune plant responses with the minimal fitness cost (Vlot *et al.*, 2009; Thaler *et al.*, 2012).

JA is a lipid-derived hormone whose biosynthesis begins in the chloroplast but is completed in the peroxisome. JA biosynthesis is initiated by the release of  $\alpha$ -linolenic acid from galactolipids of plastidial membranes and followed by the consecutive action of plastid-localized lipoxygenase (LOX), allene oxide synthase (AOS), and allene oxide cyclase (AOC) to render the precursor molecule *cis*-OPDA [*cis*-(+)-12-oxo-phytodienoic acid]. *cis*-OPDA is then transported to peroxisomes for subsequent reduction and  $\beta$ -oxidation, giving rise to the final product, (+)-7-iso-JA. After being released into the cytosol, (+)-7-iso-JA is conjugated to the amino acid isoleucine to form the bioactive form of the hormone, (+)-7-iso-JA-Ile (JA-Ile) (Wasternack and Hause, 2013). In

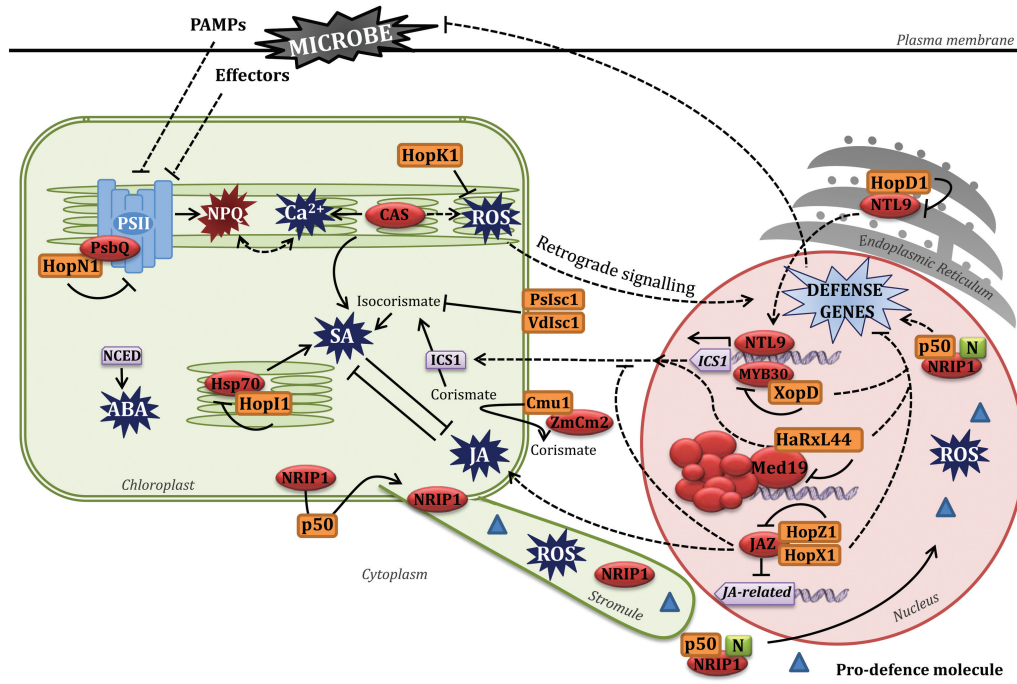

**Fig. 1.** The chloroplast plays a central role during plant immunity. PAMP perception leads to reduced PSII activity and subsequent reduction in NPQ. The chloroplast-localized protein CAS is involved in stromal  $\text{Ca}^{2+}$  transients, which have been proposed to be linked to NPQ and to a ROS burst. ROS production induces nuclear defence gene expression by retrograde signalling, which restricts pathogen growth. Some effectors are able to inhibit photosynthetic  $\text{CO}_2$  assimilation, thus blocking the ROS burst and favouring pathogen proliferation. Interaction of the effector HopN1 with the PSII protein PsbQ blocks ROS production. Major steps of biosynthesis of defence-related hormones SA, JA, and ABA occur in the chloroplast. Chloroplastic pro-defence signal biosynthesis promotes stromule formation. The viral effector p50 induces relocation of chloroplastic NRIP1 and pro-defence molecules to the nucleus where the R protein N is able to induce defence gene expression. Cytoplasmic interaction between the chorismate mutase effector protein Cmu1 and the host chorismate mutase ZmCm2 reduces chorismate availability for SA biosynthesis in the chloroplast. The effectors PsIscl and VdIscl hydrolyse isochorismate, thus perturbing SA homeostasis. Interaction of Hop11 with chloroplastic Hsp70 blocks SA production. HopK1 is also able to block ROS production, although its target(s) remain(s) unknown. The effector XopD blocks MYB30-mediated nuclear induction of *ICS1* expression. Interaction of HopD1 with NTL9 in the ER may result in reduced NTL9-mediated induction of *ICS1*. HaRxL44 induces Med19a proteasomal degradation and thus repression and induction of SA and JA signalling, respectively. HopZ1a and HopX1 induce degradation of JA signalling repressors, thus enhancing JA and repressing SA signalling. Effectors are indicated as orange rectangles and plant proteins as red ellipses. See the text for details.

contrast to SA, the production of JA is induced after the attack of necrotrophic pathogens, nematodes, and herbivorous insects (reviewed in Pieterse *et al.*, 2012; Wasternack and Hause, 2013; Campos *et al.*, 2014). Since the first described example in tomato, antagonism between SA and JA signalling pathways has been uncovered in numerous plant species and revealed that increased resistance against biotrophs often correlates with enhanced susceptibility to necrotrophs, and vice versa (van Wees *et al.*, 1999; Spoel *et al.*, 2003; Grant and Lamb, 2006; Gimenez-Ibanez and Solano, 2013). This active interplay between SA and JA contributes to optimize the defence response by prioritizing one signalling pathway over the other, depending on the invading pathogen (Kunkel and Brooks, 2002; Bostock, 2005; Verhage *et al.*, 2010).

ABA is derived from  $\text{C}_{40}$  epoxy-carotenoid precursors, also called xanthophylls, in the plastid (Nambara and Marion-Poll, 2005). Cleavage of *cis*-isomers of xanthophylls by 9-*cis*-epoxy-carotenoid dioxygenases (NCEDs) represents a first key step towards ABA biosynthesis to form a  $\text{C}_{15}$  product, xanthoxin. Xanthoxin is then converted to ABA by a two-step reaction in the cytosol (Nambara and Marion-Poll, 2005). ABA is well known as a major stress-related plant hormone in the abiotic stress response, particularly in response

to drought. In addition, ABA can also act as a positive or a negative regulator of plant defence depending on the interaction (Mauch-Mani and Mauch, 2005; Asselbergh *et al.*, 2008; Fan *et al.*, 2009; Ton *et al.*, 2009; Kazan and Lyons, 2014). Negative interactions of ABA with major defence-related phytohormones, including SA and JA, have been described (Yasuda *et al.*, 2008; de Torres Zabala *et al.*, 2009; Sánchez-Vallet *et al.*, 2012). Similarly, our view on other chloroplast-derived phytohormones changed recently as a role for phytohormones, such as SA or JA with important roles in defence against pathogens, additionally emerged in the context of abiotic stress responses. This aspect is discussed in the review article by Kmiecik and co-workers in this special issue (Kmiecik *et al.*, 2016).

In addition to their role in the biosynthesis of defence-related hormones, chloroplasts are also important sites of intracellular  $\text{Ca}^{2+}$  storage in plant cells (Stael *et al.*, 2012a). Extracellular PAMP signals are rapidly relayed to chloroplasts during the early stages of immune signalling (Stael *et al.*, 2015). Indeed, perception of flg22, chitin, cryptogin, or oligogalacturonides generates a transient  $\text{Ca}^{2+}$  increase in the chloroplast stroma within a few minutes (Manzoor *et al.*, 2012; Nomura *et al.*, 2012). The chloroplast-resident,  $\text{Ca}^{2+}$ -binding



protein CALCIUM-SENSING RECEPTOR (CAS) plays a critical role in connecting chloroplasts to cytoplasmic–nuclear immune responses triggered during both PTI and ETI and is involved in the regulation of SA biosynthesis. Ca<sup>2+</sup>-dependent phosphorylation of CAS was previously demonstrated (Stael *et al.*, 2012b). Potential links between non-photochemical quenching (NPQ) and Ca<sup>2+</sup> signalling have been suggested (Petroustos *et al.*, 2011; Manzoor *et al.*, 2012). Gene expression analysis after flg22 elicitation further revealed that CAS is required for the down-regulation of nuclear-encoded photosynthesis-related genes and up-regulation of defence gene expression through ROS-mediated retrograde signalling to the nucleus (Nomura *et al.*, 2012). Indeed, in addition to the primary apoplastic ROS production that is rapidly triggered after pathogen perception, the chloroplast is an essential provider of ROS during the initiation and promotion of cell death during the HR (Straus *et al.*, 2010; Chaouch *et al.*, 2012; Shapiguzov *et al.*, 2012). A recent study suggested that ROS production may restrict bacterial multiplication of non-pathogenic *hrp* mutant bacteria and potentially be the target of effector proteins from wild-type bacterial strains (Mitchell *et al.*, 2015). Reduction of O<sub>2</sub> by the photosynthetic electron transport chain in chloroplasts can result in the formation of a series of reduced forms of O<sub>2</sub>, or ROS, that include the superoxide anion radical (O<sub>2</sub><sup>•-</sup>), hydrogen peroxide (H<sub>2</sub>O<sub>2</sub>), and the hydroxyl radical (OH<sup>•</sup>). ROS also include singlet oxygen (<sup>1</sup>O<sub>2</sub>), which is generated by energy transfer from other molecules, mainly from an excited chlorophyll triplet state (Pospisil, 2011). Analysis of the chloroplast proteome after PAMP treatment showed reduced accumulation of six photosynthetic proteins including PsbS, a photosystem II (PSII) subunit that is involved in dissipation of excessive light energy by NPQ (Göhre *et al.*, 2012). Weaker accumulation of the PsbS protein correlates with reduced NPQ, which is linked to accumulation of excited electrons and ROS production in the chloroplast (Hideg *et al.*, 2008). In agreement with these findings, recent global transcriptome studies show that PAMP perception leads to rapid suppression of nuclear-encoded chloroplast-targeted genes (NECGs), in particular down-regulation of photosynthetic gene expression, which is followed by production of photosynthesis-derived ROS in the chloroplast (de Torres Zabala *et al.*, 2015; Lewis *et al.*, 2015). Indeed, early PAMP-triggered transcriptional responses (between 0 and 2 h post-inoculation) were found to be related to chloroplast-related functions, including ROS production, SA synthesis, and photosynthesis (Lewis *et al.*, 2015). Interestingly, a recent study showed that light is required for both up- and down-regulation of genes induced and repressed, respectively, after flg22 treatment, as well as for SA accumulation (Sano *et al.*, 2014). Moreover, photosynthetic electron flow appears to play a central role in controlling the light-dependent expression of flg22-inducible defense NECGs (Sano *et al.*, 2014). Finally, induction of defence gene expression following ROS-mediated retrograde signalling correlates with restriction of bacterial proliferation although a direct link among the three processes remains to be formally demonstrated (Göhre and Robatzek, 2008; Nomura *et al.*, 2012; de Torres Zabala *et al.*, 2015; Lewis *et al.*, 2015).

## Stromules function as molecular highways to transduce pro-defence molecules from chloroplasts to the nucleus

In tobacco, recognition of the 50 kDa helicase domain of *Tobacco mosaic virus* (TMV) replicase (p50) by the NBL protein N leads to HR-mediated cell death and plant resistance. Caplan and co-workers previously showed that this recognition event requires the chloroplastic protein NRIP1 (N Receptor Interacting Protein1) (Caplan *et al.*, 2008). Intriguingly, NRIP1 was reported to relocate from chloroplasts to the cytoplasm and nucleus of TMV-infected tobacco cells. Although the mechanism involved in NRIP1 relocation was not described, the authors suggested the involvement of stromules in NRIP1 nuclear import during N-mediated defence (Caplan *et al.*, 2008). Stromules (stroma-filled tubules) are dynamic structures extending from the surface of all plastid types, including etioplasts, leucoplasts, amyloplasts, and chromoplasts (Natesan *et al.*, 2005).

In a recent work, Caplan and collaborators confirmed the formation of highly dynamic tubular projections from chloroplasts during N-mediated viral defence in *Nicotiana benthamiana* (Caplan *et al.*, 2015). Similarly, stromule formation was observed in response to bacteria-triggered ETI in Arabidopsis, suggesting that stromule induction may be a general response during the immune response against bacteria and viruses (Caplan *et al.*, 2015). Induction of stromules was observed both within the infection site and along the borders of sites where HR was developing, suggesting that pro-defence signalling molecules may play a role in cell to cell signalling during stromule formation. Indeed, exogenous application of H<sub>2</sub>O<sub>2</sub> and SA induced the formation of stromules, thus supporting the idea that pro-defence molecules may act as signals for stromule induction.

It was suggested that stromules may play a role in facilitating the transport of molecules among organelles by increasing the surface area of exchange and bringing plastids into close proximity with other organelles (Hanson and Sattarzadeh, 2011, 2013). Indeed, association of stromules with the plasma membrane, mitochondria, and nuclei has been described (Hanson and Sattarzadeh, 2011; Schattat *et al.*, 2011a, b), suggesting that stromules may allow the exchange of proteins and metabolites between plastids and other subcellular compartments (Kwok and Hanson, 2004; Brunkard *et al.*, 2015). Remarkably, Caplan and co-workers showed that stromules develop abundant connections with nuclei during HR-inducing ETI, tightly tethering the chloroplast outer membrane and the nuclear envelope (Caplan *et al.*, 2015). These associations of chloroplasts and nuclei correlate with increased nuclear accumulation of NRIP1 that moves from chloroplasts and accumulates in nuclei during immune signalling. By monitoring H<sub>2</sub>O<sub>2</sub> levels after induction of the immune response, the authors showed that, following a burst of H<sub>2</sub>O<sub>2</sub> production in the chloroplast, H<sub>2</sub>O<sub>2</sub> moves from the chloroplast to the nucleus through chloroplast to nucleus connections (Caplan *et al.*, 2015).

Overexpression of the targeting peptide of CHUP1 (Chloroplast Unusual Positioning1), an actin-binding

domain-containing protein that is targeted to the chloroplast outer envelope, results in strong reduction of stromule formation under HR conditions (Caplan *et al.*, 2015). In contrast, *CHUPI* silencing and knockout results in constitutive formation of stromules and enhanced HR. These results are in agreement with previous observations that stromules extend through actin microfilaments (Kwok and Hanson, 2004) and underline the role of stromules in enhancing defence-related HR.

Taken together, these results demonstrate that pathogen perception triggers the formation of stromules, which involves dynamic morphological changes at the chloroplast envelope. Moreover, stromules mediate transport of pro-defence molecules into the nucleus, and probably other subcellular compartments, thereby contributing to the amplification of defence signalling (Fig. 1). Finally, abiotic stress conditions also trigger the formation of stromules, and this is reviewed by Kmiecik and co-workers in another article of this special issue (Kmiecik *et al.*, 2016).

### Microbial effectors are able to interfere with the production/function of pro-defence molecules in the chloroplast

Consistent with the importance of a balanced production of pro-defence molecules during plant–pathogen interactions, pathogens have developed sophisticated molecular mechanisms to subvert their biosynthesis and subsequent signalling for their own benefit (Denancé *et al.*, 2013; Kazan and Lyons, 2014). The central role of hormones during plant–pathogen interactions is highlighted by the significant number of pathogenic microbes that are able to produce hormones or hormone-mimicking molecules to disturb hormone homeostasis and cause disease (Robert-Seilaniantz *et al.*, 2011; Denancé *et al.*, 2013). Since hormone production largely depends on chloroplast-based metabolic pathways, in this section we discuss effectors that are able to interfere with the production and/or function of phytohormones even without being directly targeted to plastids (Fig. 1).

The biotrophic fungus *Ustilago maydis* secretes the effector Cm1 into the cytoplasm of maize cells. Consistent with the finding that Cm1 is an active chorismate mutase, an isomerase that converts the SA precursor chorismate into prephenate, leaves infected with an *U. maydis* *cm1* mutant showed increased SA accumulation (Djamei *et al.*, 2011). Interaction of Cm1 with the maize chorismate mutase ZmCm2 in the cytoplasm of host cells was proposed to enhance the flow of chorismate from the plastid to the cytosol, thus reducing chorismate availability for SA biosynthesis in the chloroplast. Indeed, *cm1* mutants are impaired in virulence, highlighting the role of SA in maize resistance to *U. maydis* (Djamei *et al.*, 2011; Djamei and Kahmann, 2012). Similarly, the effectors PsIsc1 and VdIsc1 from the unrelated filamentous pathogens *Phytophthora sojae* and *Verticillium dahliae*, respectively, are secreted isochorismatases able to hydrolyse isochorismate in host cells, thus modulating SA biosynthesis and suppressing host immunity (Liu *et al.*, 2015).

Other effectors are able to target the transcriptional control of SA production directly. For example, the Arabidopsis transcription factor MYB30 is involved in an amplification loop modulating *ICS1* expression, and thus SA biosynthesis, which in turn modulates defence-related HR-mediated cell death after bacterial infection (Raffaele *et al.*, 2006). Targeting of the nuclear transcription factor MYB30 by the effector XopD from *Xanthomonas campestris* leads to reduced *ICS1* expression, thus compromising plant resistance and HR (Canonne *et al.*, 2011). The *Pseudomonas syringae* pv. *tomato* (*Pst*) effector HopD1 interacts with and suppresses the transcriptional activation of the ER-resident transcription factor NTM1-LIKE 9 (NTL9), thus contributing to suppression of host ETI (Block *et al.*, 2014). A recent report showed that NTL9 activates transcription of *ICS1*, which suggests that HopD1-mediated inhibition of NTL9 may affect *ICS1* activation, and thus SA production, during immune signalling (Zheng *et al.*, 2015). The effector HaRxL44 from the oomycete *Hyaloperonospora arabidopsidis* (*Hpa*) interacts with the subunit 19a of the Mediator complex (Med19a) that positively regulates resistance to *Hpa* (Caillaud *et al.*, 2013). HaRxL44 leads to Med19a proteasomal degradation and enhanced susceptibility to *Hpa* through attenuation of SA signalling. Suppression of SA responses correlated with enhanced JA signalling, showing that HaRxL44 is able to affect the balance between JA and SA signalling, thus enhancing susceptibility to biotrophic *Hpa* (Caillaud *et al.*, 2013).

Other effectors directly targeting JA signalling are HopZ1a and HopX1 from *Pseudomonas syringae*. Both effectors are able to interact with JAZ proteins, which are transcriptional repressors of JA-responsive genes and major components of the JA receptor complex (Jiang *et al.*, 2013; Gimenez-Ibanez *et al.*, 2014). HopZ1a and HopX1 use distinct catalytic activities to induce JAZ degradation. HopZ1a acetyltransferase activity induced JAZ protein degradation in a coronatine-insensitive1 (COI1)–ubiquitin proteasome manner (Jiang *et al.*, 2013), whereas the cysteine protease activity of HopX1 led to JAZ protein degradation independently of COI1 (Gimenez-Ibanez and Solano, 2013). In both cases, effector-mediated degradation of JAZ proteins results in activation of JA signalling and plant susceptibility. Remarkably, some *P. syringae* strains are able to manipulate hormonal homeostasis by producing coronatine (COR), a mimic of bioactive JA-Ile (Fonseca *et al.*, 2009). COR contributes to disease by facilitating bacterial entry through stomatal opening (Melotto *et al.*, 2008) and promoting bacterial multiplication through inhibition of SA signalling by activation of the antagonistic JA pathway (Cui *et al.*, 2005; Laurie-Berry *et al.*, 2006). Interestingly, both HopZ1a and HopX1 partially rescued the virulence defect of COR-deficient *P. syringae* strains, showing that these effectors contribute to bacterial virulence by mimicking COR-induced susceptibility (Gimenez-Ibanez and Solano, 2013; Jiang *et al.*, 2013).

Finally, manipulation of host ABA homeostasis by microbes has been also demonstrated. Indeed, several fungi are able to produce ABA directly (Dörffling *et al.*, 1984; Inomata *et al.*, 2004). In other cases, bacterial effectors have been shown to induce host ABA biosynthesis to attenuate

defence responses. For example, AvrPtoB from *P. syringae* and AvrXccC from *X. campestris* are able to overcome plant basal defence by inducing the expression of the ABA biosynthesis *NCED* genes, which disturbs ABA homeostasis through enhanced ABA accumulation (Ho *et al.*, 2013).

## Microbial effectors directly target chloroplasts to promote pathogenesis

The importance of chloroplasts as integrators of disease and defence responses is being increasingly highlighted (Stael *et al.*, 2015) and, in addition to microbial strategies to subvert accumulation and signalling of pro-defence molecules discussed earlier, the chloroplast is also emerging as a major direct target for different pathogen effectors (Fig. 1).

As mentioned earlier, PAMP perception results in rapid suppression of NECGs, leading to ROS production and restricting bacterial proliferation (de Torres Zabala *et al.*, 2015; Lewis *et al.*, 2015). The combined action of effectors from *Pst* DC3000 prevents this chloroplastic ROS burst by inhibiting photosynthetic CO<sub>2</sub> assimilation through disruption of PSII (de Torres Zabala *et al.*, 2015). Reprogramming of NECG expression and inhibition of photosynthetic CO<sub>2</sub> assimilation and ROS production are necessary events for bacterial multiplication. Moreover, the effectors HopO1-2 and HopR1 are imported into chloroplasts, showing that *P. syringae* acts both transcriptionally and post-transcriptionally to target the chloroplast. Overall, this work underlines the role of PSII in restricting bacteria and reinforces the importance of the chloroplast in integrating photosynthesis and defence signals (de Torres Zabala *et al.*, 2015).

The first report of pathogen effectors targeting the chloroplast derived from a screen from the type III secretome of *P. syringae* (Guttman *et al.*, 2002). *Pseudomonas syringae* injects ~30 different effectors into host plant cells using the type III secretion system (T3SS), which is essential for pathogenicity of *P. syringae* (Mudgett, 2005). Mutations in a single effector gene generally reduce, but do not impair, the pathogen's ability to cause disease in the host, reflecting that effectors act collectively to defeat plant defences (Kvitko *et al.*, 2009). An example of a collaborative effector is HopI1 from *P. syringae* pv. *maculicola* strain PmaES4326, as PmaES4326 lacking HopI1 only shows attenuated growth in *Arabidopsis thaliana* (Jelenska *et al.*, 2007). HopI1 is a virulence factor that localizes to the chloroplast stroma using a non-canonical import mechanism. Once in the chloroplasts, HopI1 targets the heat shock protein Hsp70, suppressing SA accumulation and chloroplast-mediated SA-dependent responses, altering thylakoid structure and thus reducing host capacity for effective defence (Jelenska *et al.*, 2007, 2010). HopI1 possesses a J domain that is essential for virulence, thylakoid remodeling, and interaction with Hsp70. HopI1 physically interacts with Hsp70, acting as a co-chaperone and increasing the ATP hydrolysis activity of Hsp70. In addition, HopI1 promotes accumulation of cytoplasmic Hsp70 and its recruitment to the chloroplasts, potentially affecting the folding/complex

assembly of chloroplast-resident proteins required for SA biosynthesis or transport (Jelenska *et al.*, 2010).

HopN1 is a *Pst* effector able to suppress cell death, ROS production, and callose deposition in *A. thaliana*. Suppression of these immune responses is dependent on HopN1 cysteine protease activity (López Solanilla *et al.*, 2004; Rodríguez Herva *et al.*, 2012). HopN1 was found to interact with the tomato protein PsbQ, one of the members of the oxygen-evolving complex (OEC) of PSII (Enami *et al.*, 2008), previously associated with stress conditions in higher plants (Coker *et al.*, 2005; Ifuku *et al.*, 2005; Gong and Yuan, 2006). HopN1 physically co-localizes with PsbQ in thylakoids and reduces the activity of PSII, probably due to PsbQ proteolysis by HopN1 (Rodríguez Herva *et al.*, 2012). Surprisingly, whilst preventing host cell death by alteration of chloroplastic ROS production, HopN1 did not contribute to bacterial growth *in planta*, supporting the co-operative role of the repertoire of the pathogen effectors in weakening host defences and promoting pathogen proliferation.

An additional *Pst* effector, HopK1, is able to suppress ROS production and callose deposition in plants challenged with the MAMP flg22. The N-terminal part of HopK1 is homologous to the transit peptide of the AvrRps4 effector from *P. syringae* pv. *pisi* and acts as a chloroplast transit peptide. Both effectors are processed *in planta* and localize in the chloroplasts. Expression *in planta* of HopK1 lacking the transit peptide suppressed neither PTI nor ETI, indicating that the targets of this effector, although as yet unknown, may be located in the chloroplasts. Similarly, transit peptide-lacking AvrRsp4 lost its ability to suppress PTI, but retained its HR-inducing activity, probably because AvrRps4 cell death-related function does not require its localization to the chloroplasts (Li *et al.*, 2014). HopK1 and AvrRps4 target(s) remain(s) to be discovered, but it has been proposed that these effectors could target components of the retrograde signalling, thus explaining their contribution to the suppression of both early and late defence responses (Li *et al.*, 2014).

The effector WtsE determines *Pantoea stewartii* ssp. *stewartii* (*Pnss*) virulence and proliferation in maize (*Zea mays*) plants (Asselin *et al.*, 2015). This effector is able to elicit water-soaked disease symptoms in host plants and to promote bacterial growth and survival (Bogdanove *et al.*, 1998; Badel *et al.*, 2006; Ham *et al.*, 2009). WtsE elicits major disruptions in several chloroplast-resident pathways: it suppresses the expression of genes involved in photosynthesis and selectively induces genes involved in shikimate and phenylpropanoid metabolism (Asselin *et al.*, 2015). Chemical disruption of the shikimate pathway suppresses WtsE-mediated pathogenicity. Up-regulation of both the shikimate and the phenylpropanoid pathways elevates the production of phenolic and phenylpropanoid compounds, such as SA and coumaroyl tyramine (CouTyr). Although the shikimate pathway results in numerous metabolites known to promote plant defence, misregulation of phenylpropanoid metabolism could represent a virulence strategy to promote or divert carbon flow into products beneficial or detrimental, respectively, to bacterial survival (Asselin *et al.*, 2015).



In recent work, Petre and co-workers investigated the subcellular localization of 20 candidate effectors of the leaf rust fungus *Melampsora larici-populina* (Petre *et al.*, 2015b). One of these secreted proteins was found to be located in the chloroplast when transiently expressed in *N. benthamiana*. It is noteworthy that subcellular localization studies of transiently expressed (candidate) effectors in *N. benthamiana* needs careful examination (e.g. AvrRps4 was localized to the cytoplasm and nucleus when transiently expressed in *N. benthamiana* and to the chloroplast in stable transgenic Arabidopsis lines (Li *et al.*, 2014)). Therefore, it cannot be ruled out that the chloroplast is the target of additional leaf rust effectors. It is still not known how filamentous pathogens enter host cells. In a follow-up work, it was shown that the leaf rust fungus chloroplast-localized effector, named CPT1, carries a transit peptide that is cleaved after translocation into the chloroplast (Petre *et al.*, 2015a). This effector exemplifies pathogen evolution to functionally mimic host-targeting sequences in order to target chloroplasts.

## Conclusions

Photosynthesis and immunity are two fundamental processes essential to the life of plants. Although these two processes have been historically investigated in a separate manner, it has become increasingly clear that they are closely connected at several levels. Considering the obvious links between yield, plant health, and photosynthetic efficiency, integrated approaches that investigate the crosstalk between photosynthesis and immunity should provide effective knowledge to be applied for plant protection.

The chloroplast plays a central role in energy production, redox homeostasis, and retrograde signalling to the nucleus that, we now know, collectively contribute to the outcome of the plant immune response. Plant cells rely on the integrated production and delivery of defence-related signals and molecules through different organelles to mount an efficient response to pathogen attack. In addition, organellar production of pro-defence molecules determines gene expression changes in the nucleus, and vice versa. Gaining knowledge on the organization and regulation of this interorganellar crosstalk during plant immune responses is an important task for future research.

## Acknowledgements

We apologize to all colleagues whose work could not be discussed because of space limitations. IS is supported by an AgreenSkills fellowship within the EU Marie-Curie FP7 COFUND People Programme (grant agreement no. 267196). Our work is supported by the French Laboratory of Excellence project 'TULIP' (ANR-10-LABX-41; ANR-11-IDEX-0002-02).

## References

Asselbergh B, De Vleeschauwer D, Höfte M. 2008. Global switches and fine-tuning—ABA modulates plant pathogen defense. *Molecular Plant-Microbe Interactions* **21**, 709–719.

Asselin JAE, Lin J, Perez-Quintero AL, *et al.* 2015. Perturbation of maize phenylpropanoid metabolism by an AvrE family type III effector from *Pantoea stewartii*. *Plant Physiology* **167**, 1117–1135.

Badel JL, Shimizu R, Oh H-S, Collmer A. 2006. A *Pseudomonas syringae* pv. tomato avrE1/hopM1 mutant is severely reduced in growth and lesion formation in tomato. *Molecular Plant-Microbe Interactions* **19**, 99–111.

Block A, Toruño TY, Elowsky CG, Zhang C, Steinbrenner J, Beynon J, Alfano JR. 2014. The *Pseudomonas syringae* type III effector HopD1 suppresses effector-triggered immunity, localizes to the endoplasmic reticulum, and targets the Arabidopsis transcription factor NTL9. *New Phytologist* **201**, 1358–1370.

Bobik K, Burch-Smith TM. 2015. Chloroplast signaling within, between and beyond cells. *Frontiers in Plant Science* **6**, 307.

Bogdanove AJ, Bauer DW, Beer SV. 1998. *Erwinia amylovora* secretes DspE, a pathogenicity factor and functional AvrE homolog, through the Hrp (type III secretion) pathway. *Journal of Bacteriology* **180**, 2244–2247.

Bostock RM. 2005. Signal crosstalk and induced resistance: straddling the line between cost and benefit. *Annual Review of Phytopathology* **43**, 545–580.

Brunkard JO, Runkel AM, Zambryski PC. 2015. Chloroplasts extend stromules independently and in response to internal redox signals. *Proceedings of the National Academy of Sciences, USA* **112**, 10044–10049.

Caillaud M-C, Asai S, Rallapalli G, Piquerez S, Fabro G, Jones JDG. 2013. A downy mildew effector attenuates salicylic acid-triggered immunity in Arabidopsis by interacting with the host mediator complex. *PLoS Biology* **11**, e1001732.

Campos ML, Kang J-H, Howe GA. 2014. Jasmonate-triggered plant immunity. *Journal of Chemical Ecology* **40**, 657–675.

Canonne J, Marino D, Jauneau A, Pouzet C, Brière C, Roby D, Rivas S. 2011. The Xanthomonas type III effector XopD targets the Arabidopsis transcription factor MYB30 to suppress plant defense. *The Plant Cell* **23**, 3498–3511.

Caplan JL, Kumar AS, Park E, Padmanabhan MS, Hoban K, Modla S, Czymmek K, Dinesh-Kumar SP. 2015. Chloroplast stromules function during innate immunity. *Developmental Cell* **34**, 45–57.

Caplan JL, Mamillapalli P, Burch-Smith TM, Czymmek K, Dinesh-Kumar SP. 2008. Chloroplastic protein NRIP1 mediates innate immune receptor recognition of a viral effector. *Cell* **132**, 449–462.

Chandran D, Rickert J, Huang Y, Steinwand MA, Marr SK, Wildermuth MC. 2014. Atypical E2F transcriptional repressor DEL1 acts at the intersection of plant growth and immunity by controlling the hormone salicylic acid. *Cell Host and Microbe* **15**, 506–513.

Chaouch S, Queval G, Noctor G. 2012. AtRbohF is a crucial modulator of defence-associated metabolism and a key actor in the interplay between intracellular oxidative stress and pathogenesis responses in Arabidopsis. *The Plant Journal* **69**, 613–627.

Chen LQ, Hou B-H, Lalonde S, *et al.* 2010. Sugar transporters for intercellular exchange and nutrition of pathogens. *Nature* **468**, 527–532.

Coker JS, Vian A, Davies E. 2005. Identification, accumulation, and functional prediction of novel tomato transcripts systemically upregulated after fire damage. *Physiologia Plantarum* **124**, 311–322.

Cooper GM. 2000. *The cell: a molecular approach*, 2nd edn. Sunderland, MA: Sinauer Associates.

Cui J, Bahrami AK, Pringle EG, Hernandez-Guzman G, Bender CL, Pierce NE, Ausubel FM. 2005. *Pseudomonas syringae* manipulates systemic plant defenses against pathogens and herbivores. *Proceedings of the National Academy of Sciences, USA* **102**, 1791–1796.

Dangl JL, Jones J. 2006. The plant immune system. *Nature* **444**, 323–32.

Dangl JL, Horvath DM, Staskawicz BJ. 2013. Pivoting the plant immune system from dissection to deployment. *Science* **341**, 746–751.

de Torres Zabala M, Bennett MH, Truman WH, Grant MR. 2009. Antagonism between salicylic and abscisic acid reflects early host-pathogen conflict and moulds plant defence responses. *The Plant Journal* **59**, 375–386.

de Torres Zabala M, Littlejohn G, Jayaraman S, *et al.* 2015. Chloroplasts play a central role in plant defence and are targeted by pathogen effectors. *Nature Plants* **1**, 15074.

Dempsey DA, Vlot AC, Wildermuth MC, Klessig DF. 2011. Salicylic acid biosynthesis and metabolism. *The Arabidopsis Book* **9**, e0156.

- Denancé N, Sánchez-Vallet A, Goffner D, Molina A.** 2013. Disease resistance or growth: the role of plant hormones in balancing immune responses and fitness costs. *Frontiers in Plant Science* **4**, 155.
- Djamei A, Kahmann R.** 2012. *Ustilago maydis*: dissecting the molecular interface between pathogen and plant. *PLoS Pathogens* **8**, e1002955.
- Djamei A, Schipper K, Rabe F, et al.** 2011. Metabolic priming by a secreted fungal effector. *Nature* **478**, 395–398.
- Dodds PN, Rathjen JP.** 2010. Plant immunity: towards an integrated view of plant–pathogen interactions. *Nature Reviews Genetics* **11**, 539–548.
- Dörffling K, Petersen W, Sprecher E, Urbasch I, Hanssen HP.** 1984. Abscisic acid in phytopathogenic fungi of the genera *Botrytis*, *Ceratocystis*, *Fusarium*, and *Rhizoctonia*. *Zeitschrift für Naturforschung, Series C* **39**, 683–684.
- Enami I, Okumura A, Nagao R, Suzuki T, Iwai M, Shen J-R.** 2008. Structures and functions of the extrinsic proteins of photosystem II from different species. *Photosynthesis Research* **98**, 349–363.
- Fan J, Hill L, Crooks C, Doerner P, Lamb C.** 2009. Abscisic acid has a key role in modulating diverse plant–pathogen interactions. *Plant Physiology* **150**, 1750–1761.
- Fonseca S, Chini A, Hamberg M, Adie B, Porzel A, Kramell R, Miersch O, Wasternack C, Solano R.** 2009. (+)-7-iso-Jasmonoyl-L-isoleucine is the endogenous bioactive jasmonate. *Nature Chemical Biology* **5**, 344–350.
- Garcion C, Lohmann A, Lamodièrre E, Catinot J, Buchala A, Doermann P, Métraux J-P.** 2008. Characterization and biological function of the *ISOCHORISMATE SYNTHASE2* gene of *Arabidopsis*. *Plant Physiology* **147**, 1279–1287.
- Gimenez-Ibanez S, Boter M, Fernández-Barbero G, Chini A, Rathjen JP, Solano R.** 2014. The bacterial effector HopX1 targets JAZ transcriptional repressors to activate jasmonate signaling and promote infection in *Arabidopsis*. *PLoS Biology* **12**, e1001792.
- Gimenez-Ibanez S, Solano R.** 2013. Nuclear jasmonate and salicylate signaling and crosstalk in defense against pathogens. *Frontiers in Plant Science* **4**, 72.
- Glazebrook J.** 2005. Contrasting mechanisms of defense against biotrophic and necrotrophic pathogens. *Annual Review of Phytopathology* **43**, 205–227.
- Gong Y-W, Yuan Y-J.** 2006. Nitric oxide mediates inactivation of glutathione S-transferase in suspension culture of *Taxus cuspidata* during shear stress. *Journal of Biotechnology* **123**, 185–192.
- Göhre V, Jones AM, Sklenář J, Robatzek S, Weber AP.** 2012. Molecular crosstalk between PAMP-triggered immunity and photosynthesis. *Molecular Plant-Microbe Interactions* **25**, 1083–1092.
- Göhre V, Robatzek S.** 2008. Breaking the barriers: microbial effector molecules subvert plant immunity. *Annual Review of Phytopathology* **46**, 189–215.
- Grant M, Lamb C.** 2006. Systemic immunity. *Current Opinion in Plant Biology* **9**, 414–420.
- Guttman DS, Vinatzer BA, Sarkar SF, Ranall MV, Kettler G, Greenberg JT.** 2002. A functional screen for the type III (Hrp) secretome of the plant pathogen *Pseudomonas syringae*. *Science* **295**, 1722–1726.
- Ham JH, Majerczak DR, Nomura K, Mecey C, Uribe F, He SY, Mackey D, Coplin DL.** 2009. Multiple activities of the plant pathogen type III effector proteins WtsE and AvrE require WxxxE motifs. *Molecular Plant-Microbe Interactions* **22**, 703–712.
- Hammerschmidt R.** 1999. Induced disease resistance: how do induced plants stop pathogens? *Physiological and Molecular Plant Pathology* **55**, 77–84.
- Hanson MR, Sattarzadeh A.** 2011. Stromules: recent insights into a long neglected feature of plastid morphology and function. *Plant Physiology* **155**, 1486–1492.
- Hanson MR, Sattarzadeh A.** 2013. Trafficking of proteins through plastid stromules. *The Plant Cell* **25**, 2774–2782.
- Hideg E, Kós P, Schreiber U.** 2008. Imaging of NPQ and ROS formation in tobacco leaves: heat inactivation of the water–water cycle prevents down-regulation of PSII. *Plant and Cell Physiology* **49**, 1879–1886.
- Ho Y-P, Tan CM, Li M-Y, Lin H, Deng W-L, Yang J-Y.** 2013. The AvrB\_AvrC domain of AvrXccC of *Xanthomonas campestris* pv. *campestris* is required to elicit plant defense responses and manipulate ABA homeostasis. *Molecular Plant-Microbe Interactions* **26**, 419–430.
- Ifuku K, Yamamoto Y, Ono T-A, Ishihara S, Sato F.** 2005. PsbP protein, but not PsbQ protein, is essential for the regulation and stabilization of photosystem II in higher plants. *Plant Physiology* **139**, 1175–1184.
- Inomata M, Hirai N, Yoshida R, Ohigashi H.** 2004. Biosynthesis of abscisic acid by the direct pathway via ionylideneethane in a fungus, *Cercospora cruenta*. *Bioscience, Biotechnology, and Biochemistry* **68**, 2571–2580.
- Ishihara T, Sekine KT, Hase S, Kanayama Y, Seo S, Ohashi Y, Kusano T, Shibata D, Shah J, Takahashi H.** 2008. Overexpression of the *Arabidopsis thaliana* EDS5 gene enhances resistance to viruses. *Plant Biology* **10**, 451–461.
- Jelenska J, van Hal JA, Greenberg JT.** 2010. *Pseudomonas syringae* hijacks plant stress chaperone machinery for virulence. *Proceedings of the National Academy of Sciences, USA* **107**, 13177–13182.
- Jelenska J, Yao N, Vinatzer BA, Wright CM, Brodsky JL, Greenberg JT.** 2007. A J domain virulence effector of *Pseudomonas syringae* remodels host chloroplasts and suppresses defenses. *Current Biology* **17**, 499–508.
- Jiang S, Yao J, Ma K-W, Zhou H, Song J, He SY, Ma W.** 2013. Bacterial effector activates jasmonate signaling by directly targeting JAZ transcriptional repressors. *PLoS Pathogens* **9**, e1003715.
- Kazan K, Lyons R.** 2014. Intervention of phytohormone pathways by pathogen effectors. *The Plant Cell* **26**, 2285–2309.
- Kmieciak P, Leonardelli M, Teige M.** 2016. Novel connections in plant organellar signalling link different stress responses and different signalling pathways. *Journal of Experimental Botany* **67**, 3793–3807.
- Kozuleva M, Klenina I, Proskuryakov I, Kirilyuk I, Ivanov B.** 2011. Production of superoxide in chloroplast thylakoid membranes. *FEBS Letters* **585**, 1067–1071.
- Kunkel BN, Brooks DM.** 2002. Cross talk between signaling pathways in pathogen defense. *Current Opinion in Plant Biology* **5**, 325–331.
- Kvitko BH, Park DH, Velásquez AC, Wei C-F, Russell AB, Martin GB, Schneider DJ, Collmer A.** 2009. Deletions in the repertoire of *Pseudomonas syringae* pv. *tomato* DC3000 type III secretion effector genes reveal functional overlap among effectors. *PLoS Pathogens* **5**, e1000388.
- Kwok EY, Hanson MR.** 2004. Plastids and stromules interact with the nucleus and cell membrane in vascular plants. *Plant Cell Reports* **23**, 188–195.
- Laurie-Berry N, Joardar V, Street IH, Kunkel BN.** 2006. The *Arabidopsis thaliana* *JASMONATE INSENSITIVE 1* gene is required for suppression of salicylic acid-dependent defenses during infection by *Pseudomonas syringae*. *Molecular Plant-Microbe Interactions* **19**, 789–800.
- León J, Sánchez-Serrano JJ.** 1999. Molecular biology of jasmonic acid biosynthesis in plants. *Plant Physiology and Biochemistry* **37**, 373–380.
- Lewis LA, Polanski K, de Torres Zabala M, et al.** 2015. Transcriptional dynamics driving MAMP-triggered immunity and pathogen effector-mediated immunosuppression in *Arabidopsis* leaves following infection with *Pseudomonas syringae* pv. *tomato* DC3000. *The Plant Cell* **27**, 3038–3064.
- Li G, Fröhlich JE, Elowsky C, Msanne J, Ostosh AC, Zhang C, Awada T, Alfano JR.** 2014. Distinct *Pseudomonas* type-III effectors use a cleavable transit peptide to target chloroplasts. *The Plant Journal* **77**, 310–321.
- Liu JW, Deng DY, Yu Y, Liu FF, Lin BX, Cao Y-J, Hu XG, Wu JZ.** 2015. In situ detection of salicylic acid binding sites in plant tissues. *Luminescence* **30**, 18–25.
- López Solanilla E, Bronstein PA, Schneider AR, Collmer A.** 2004. HopPtoN is a *Pseudomonas syringae* Hrp (type III secretion system) cysteine protease effector that suppresses pathogen-induced necrosis associated with both compatible and incompatible plant interactions. *Molecular Microbiology* **54**, 353–365.
- Macho AP, Zipfel C.** 2014. Plant PRRs and the activation of innate immune signaling. *Molecular Cell* **54**, 263–272.
- Manzoor H, Chiltz A, Madani S, Vatsa P, Schoefs B, Pugin A, Garcia-Brugger A.** 2012. Calcium signatures and signaling in cytosol and



- organelles of tobacco cells induced by plant defense elicitors. *Cell Calcium* **51**, 434–444.
- Mauch-Mani B, Mauch F.** 2005. The role of abscisic acid in plant–pathogen interactions. *Current Opinion In Plant Biology* **8**, 409–414.
- Melotto M, Mecey C, Niu Y, et al.** 2008. A critical role of two positively charged amino acids in the Jas motif of Arabidopsis JAZ proteins in mediating coronatine- and jasmonoyl isoleucine-dependent interactions with the CO11 F-box protein. *The Plant Journal* **55**, 979–988.
- Mishina TE, Zeier J.** 2007. Pathogen-associated molecular pattern recognition rather than development of tissue necrosis contributes to bacterial induction of systemic acquired resistance in Arabidopsis. *The Plant Journal* **50**, 500–513.
- Mitchell K, Brown I, Knox P, Mansfield J.** 2015. The role of cell wall-based defences in the early restriction of non-pathogenic *hrp* mutant bacteria in Arabidopsis. *Phytochemistry* **112**, 139–150.
- Mudgett MB.** 2005. New insights to the function of phytopathogenic bacterial type III effectors in plants. *Annual Review of Plant Biology* **56**, 509–531.
- Nambara E, Marion-Poll A.** 2005. Abscisic acid biosynthesis and catabolism. *Annual Review of Plant Biology* **56**, 165–185.
- Natesan SKA, Sullivan JA, Gray JC.** 2005. Stromules: a characteristic cell-specific feature of plastid morphology. *Journal of Experimental Botany* **56**, 787–797.
- Nicaise V, Roux M, Zipfel C.** 2009. Recent advances in PAMP-triggered immunity against bacteria: pattern recognition receptors watch over and raise the alarm. *Plant Physiology* **150**, 1638–1647.
- Nomura H, Komori T, Uemura S, et al.** 2012. Chloroplast-mediated activation of plant immune signalling in Arabidopsis. *Nature Communications* **3**, 926.
- Padmanabhan MS, Dinesh-Kumar SP.** 2010. All hands on deck—the role of chloroplasts, endoplasmic reticulum, and the nucleus in driving plant innate immunity. *Molecular Plant-Microbe Interactions* **23**, 1368–1380.
- Pajerowska-Mukhtar KM, Wang W, Tada Y, Oka N, Tucker CL, Fonseca JP, Dong X.** 2012. The HSF-like transcription factor TBF1 is a major molecular switch for plant growth-to-defense transition. *Current Biology* **22**, 103–112.
- Petre B, Lorrain C, Saunders DGO, Win J, Sklenar J, Duplessis S, Kamoun S.** 2015a. Rust fungal effectors mimic host transit peptides to translocate into chloroplasts. *Cellular Microbiology* (in press).
- Petre B, Saunders DGO, Sklenar J, Lorrain C, Win J, Duplessis S, Kamoun S.** 2015b. Candidate effector proteins of the rust pathogen *Melampsora larici-populina* target diverse plant cell compartments. *Molecular Plant-Microbe Interactions* **28**, 689–700.
- Petroutsos D, Busch A, Janssen I, Trompelt K, Bergner SV, Weini S, Holtkamp M, Karst U, Kudla J, Hippler M.** 2011. The chloroplast calcium sensor CAS is required for photoacclimation in *Chlamydomonas reinhardtii*. *The Plant Cell* **23**, 2950–2963.
- Pieterse CMJ, Van der Does D, Zamioudis C, Leon-Reyes A, Van Wees SCM.** 2012. Hormonal modulation of plant immunity. *Annual Review of Cell and Developmental Biology* **28**, 489–521.
- Pospisil P.** 2011. Molecular mechanisms of production and scavenging of reactive oxygen species by photosystem II. *Biochimica et Biophysica Acta* **1817**, 218–231.
- Raffaele S, Rivas S, Roby D.** 2006. An essential role for salicylic acid in AtMYB30-mediated control of the hypersensitive cell death program in Arabidopsis. *FEBS Letters* **580**, 3498–3504.
- Robert-Seilantantz A, Grant M, Jones JDG.** 2011. Hormone crosstalk in plant disease and defense: more than just jasmonate–salicylate antagonism. *Annual Review of Phytopathology* **49**, 317–343.
- Rodríguez Herva JJ, González Melendi P, Cuartas Lanza R, et al.** 2012. A bacterial cysteine protease effector protein interferes with photosynthesis to suppress plant innate immune responses. *Cellular Microbiology* **14**, 669–681.
- Sánchez-Vallet A, López G, Ramos B, et al.** 2012. Disruption of abscisic acid signaling constitutively activates Arabidopsis resistance to the necrotrophic fungus *Plectosphaerella cucumerina*. *Plant Physiology* **160**, 2109–2124.
- Sano S, Aoyama M, Nakai K, Shimotani K, Yamasaki K, Sato MH, Tojo D, Suwastika IN, Nomura H, Shiina T.** 2014. Light-dependent expression of *flg22*-induced defense genes in Arabidopsis. *Frontiers in Plant Science* **5**, 531.
- Schattat M, Barton K, Baudisch B, Klösigen RB, Mathur J.** 2011a. Plastid stromule branching coincides with contiguous endoplasmic reticulum dynamics. *Plant Physiology* **155**, 1667–1677.
- Schattat M, Barton K, Mathur J.** 2011b. Correlated behavior implicates stromules in increasing the interactive surface between plastids and ER tubules. *Plant Signaling and Behavior* **6**, 715–718.
- Seyfferth C, Tsuda KT.** 2014. Salicylic acid signal transduction: the initiation of biosynthesis, perception and transcriptional reprogramming. *Frontiers in Plant Science* **5**, 379.
- Shapiguzov A, Vainonen JP, Wrzaczek M, Kangasjärvi J.** 2012. ROS-talk—how the apoplast, the chloroplast, and the nucleus get the message through. *Frontiers in Plant Science* **3**, 292.
- Spoel SH, Dong X.** 2012. How do plants achieve immunity? Defence without specialized immune cells. *Nature Reviews Immunology* **12**, 89–100.
- Spoel SH, Koornneef A, Claessens SMC, et al.** 2003. NPR1 modulates cross-talk between salicylate- and jasmonate-dependent defense pathways through a novel function in the cytosol. *The Plant Cell* **15**, 760–770.
- Stael S, Kmiecik P, Willems P, Van Der Kelen K, Coll NS, Teige M, Van Breusegem F.** 2015. Plant innate immunity—sunny side up? *Trends in Plant Science* **20**, 3–11.
- Stael S, Rocha AG, Wimberger T, Anrather D, Vothknecht UC, Teige M.** 2012b. Crosstalk between calcium signalling and protein phosphorylation at the thylakoid. *Journal of Experimental Botany* **63**, 1725–1733.
- Stael S, Wurzing B, Mair A, Mehmer N, Vothknecht UC, Teige M.** 2012a. Plant organellar calcium signalling: an emerging field. *Journal of Experimental Botany* **63**, 1525–1542.
- Straus MR, Rietz S, Ver Loren van Themaat E, Bartsch M, Parker JE.** 2010. Salicylic acid antagonism of EDS1-driven cell death is important for immune and oxidative stress responses in Arabidopsis. *The Plant Journal* **62**, 628–640.
- Strawn MA, Marr SK, Inoue K, Inada N, Zubieta C, Wildermuth MC.** 2007. Arabidopsis isochorismate synthase functional in pathogen-induced salicylate biosynthesis exhibits properties consistent with a role in diverse stress responses. *Journal of Biological Chemistry* **282**, 5919–5933.
- Stuart LM, Paquette N, Boyer L.** 2013. Effector-triggered versus pattern-triggered immunity: how animals sense pathogens. *Nature Reviews Immunology* **13**, 199–206.
- Swarbrick PJ, Liefert PS.** 2006. Metabolic consequences of susceptibility and resistance (race-specific and broad-spectrum) in barley leaves challenged with powdery mildew. *Plant, Cell and Environment* **29**, 1061–1076.
- Tanaka S, Han X, Kahmann R.** 2015. Microbial effectors target multiple steps in the salicylic acid production and signaling pathway. *Frontiers in Plant Science* **6**, 882.
- Thaler JS, Humphrey PT, Whiteman NK.** 2012. Evolution of jasmonate and salicylate signal crosstalk. *Trends in Plant Science* **17**, 260–270.
- Ton J, Flors V, Mauch-Mani B.** 2009. The multifaceted role of ABA in disease resistance. *Trends in Plant Science* **14**, 310–317.
- Torres MA, Jones JDG, Dangl JL.** 2006. Reactive oxygen species signaling in response to pathogens. *Plant Physiology* **141**, 373–378.
- Trotta A, Rahikainen M, Konert G, Finazzi G, Kangasjärvi S.** 2014. Signalling crosstalk in light stress and immune reactions in plants. *Philosophical Transactions of the Royal Society B: Biological Sciences* **369**, 20130235–20130235.
- van Wees SC, Luijendijk M, Smoorenburg I, Van Loon LC, Pieterse CM.** 1999. Rhizobacteria-mediated induced systemic resistance (ISR) in Arabidopsis is not associated with a direct effect on expression of known defense-related genes but stimulates the expression of the jasmonate-inducible gene *Atvsp* upon challenge. *Plant Molecular Biology* **41**, 537–549.
- Verhage A, Van Wees SCM, Pieterse CMJ.** 2010. Plant immunity: it's the hormones talking, but what do they say? *Plant Physiology* **154**, 536–540.
- Vlot AC, Dempsey DA, Klessig DF.** 2009. Salicylic acid, a multifaceted hormone to combat disease. *Annual Review of Phytopathology* **47**, 177–206.

**Wasternack C, Hause B.** 2013. Jasmonates: biosynthesis, perception, signal transduction and action in plant stress response, growth and development. An update to the 2007 review in *Annals of Botany*. *Annals of Botany* **111**, 1021–1058.

**Wildermuth MC, Dewdney J, Wu G, Ausubel FM.** 2001. Isochorismate synthase is required to synthesize salicylic acid for plant defence. *Nature* **414**, 562–565.

**Yasuda M, Ishikawa A, Jikumaru Y, *et al.*** 2008. Antagonistic interaction between systemic acquired resistance and the abscisic

acid-mediated abiotic stress response in *Arabidopsis*. *The Plant Cell* **20**, 1678–1692.

**Zheng X-Y, Zhou M, Yoo H, Pruneda-Paz JL, Spivey NW, Kay SA, Dong X.** 2015. Spatial and temporal regulation of biosynthesis of the plant immune signal salicylic acid. *Proceedings of the National Academy of Sciences, USA* **112**, 9166–9173.

**Zurbriggen MD, Carrillo N, Hajirezaei MR.** 2010. ROS signaling in the hypersensitive response: when, where and what for? *Plant Signaling and Behaviour* **5**, 393–396.
